# Supplementary material for: Changes in Trophic Groups of Protists With Conversion of Rainforest Into Rubber and Oil Palm Plantations
Source: Front Microbiol. 2019 Feb 12;10:240. doi: 10.3389/fmicb.2019.00240 (PMC6380168; doi:10.3389/fmicb.2019.00240)
Supplement: Supplementary file 2 [file Table_1.XLSX]

## Sheet: Tabelle1
Supplementary Table 1: Categorisation of protist taxa into five trophic groups.
Trophic group	Taxon
Phagotrophs	Amoebozoa	Dictyamoeba
Phagotrophs	Amoebozoa	Dictyostelia
Phagotrophs	Amoebozoa	Discosea	Flabellinia
Phagotrophs	Amoebozoa	Discosea	Longamoebia	Centramoebida	Acanthamoeba
Phagotrophs	Amoebozoa	Discosea	Dactylopodia	Mayorella
Phagotrophs	Amoebozoa	Gracilipodida
Phagotrophs	Amoebozoa	Ischnamoeba
Phagotrophs	Amoebozoa	Myxogastria
Phagotrophs	Amoebozoa	Protosteliales
Phagotrophs	Amoebozoa	Tubulinea
Phagotrophs	Amoebozoa	Variosea
Phagotrophs	Amoebozoa	Cavosteliida
Phagotrophs	Amoebozoa	Protosporangiida
Phagotrophs	Amoebozoa	Schizoplasmodiida
Photoautotrophs	Archaeplastida	Chloroplastida
Photoautotrophs	Archaeplastida	Rhodophyceae
Phagotrophs	Excavata	Discoba	Discicristata	Euglenozoa	Kinetoplastea
Phagotrophs	Excavata	Discoba	Discicristata	Heterolobosea	Tetramitia
Phagotrophs	Excavata	Discoba	Jakobida	Jakobida	Jakobida
Phagotrophs	Excavata	Malawimonas
Symbionts	Excavata	Metamonada	Parabasalia
Symbionts	Excavata	Metamonada	Preaxostyla	Oxymonadida
Phagotrophs	Excavata	Metamonada	Preaxostyla	Paratrimastix
Phagotrophs	Excavata	Ancyromonadida
Phagotrophs	Hacrobia	Centrohelida
Phagotrophs	Hacrobia	Palpitia	Palpitomonas
Photoautotrophs	Hacrobia	Cryptophyceae
Photoautotrophs	Hacrobia	Haptophyta
Phagotrophs	Harosa	Telonemia
Animal parasites	Harosa	Alveolata	Apicomplexa
Phagotrophs	Harosa	Alveolata	Ciliophora
Phagotrophs	Harosa	Alveolata	Colponema
Photoautotrophs/Phagotrophs	Harosa	Alveolata	Dinoflagellata
Photoautotrophs	Harosa	Alveolata	Protalveolata	Chromerida
Phagotrophs	Harosa	Alveolata	Protalveolata	Colpodellida
Animal parasites	Harosa	Alveolata	Protalveolata	Perkinsidae
Symbionts	Harosa	Alveolata	Protalveolata	Syndiniales
Phagotrophs	Harosa	Rhizaria	Cercozoa	Cercomonadida
Phagotrophs	Harosa	Rhizaria	Cercozoa	Cholamonas
Phagotrophs	Harosa	Rhizaria	Cercozoa	Glissomonadida
Phagotrophs	Harosa	Rhizaria	Cercozoa	Granofilosea	Massisteria
Phagotrophs	Harosa	Rhizaria	Cercozoa	Gromia
Phagotrophs	Harosa	Rhizaria	Cercozoa	Gymnophrys
Phagotrophs	Harosa	Rhizaria	Cercozoa	Imbricatea	Marimonadida
Phagotrophs	Harosa	Rhizaria	Cercozoa	Imbricatea	Nudifila
Phagotrophs	Harosa	Rhizaria	Cercozoa	Imbricatea	Silicofilosea
Phagotrophs	Harosa	Rhizaria	Cercozoa	Imbricatea	Spongomonadida
Phagotrophs	Harosa	Rhizaria	Cercozoa	Metromonadea
Phagotrophs	Harosa	Rhizaria	Cercozoa	Pansomonadida	Aurigamonas
Plant parasites	Harosa	Rhizaria	Cercozoa	Phytomyxea
Phagotrophs	Harosa	Rhizaria	Cercozoa	Sainouron
Phagotrophs	Harosa	Rhizaria	Cercozoa	Thecofilosea
Phagotrophs	Harosa	Rhizaria	Cercozoa	Vampyrellidae
Phagotrophs	Harosa	Rhizaria	Retaria
Phagotrophs	Harosa	Stramenopiles	Bicosoecida
Phagotrophs	Harosa	Stramenopiles	Cantina
Phagotrophs	Harosa	Stramenopiles	Hyphochytriomycetes
Phagotrophs/Plant parasites	Harosa	Stramenopiles	Labyrinthulomycetes
Photoautotrophs	Harosa	Stramenopiles	Ochrophyta	Bolidomonas
Photoautotrophs/Phagotrophs	Harosa	Stramenopiles	Ochrophyta	Chrysophyceae
Photoautotrophs	Harosa	Stramenopiles	Ochrophyta	Diatomea
Photoautotrophs	Harosa	Stramenopiles	Ochrophyta	Eustigmatophyceae
Photoautotrophs	Harosa	Stramenopiles	Ochrophyta	Phaeophyceae
Plant parasites	Harosa	Stramenopiles	Peronosporomycetes
Phagotrophs	Harosa	Stramenopiles	Placididea
Photoautotrophs	Harosa	Stramenopiles	Xanthophyceae
Photoautotrophs	Incertae sedis	Picozoa
Phagotrophs	Opisthokonta	Holozoa	Choanoflagellida
Phagotrophs	Opisthokonta	Holozoa	Filasterea
Animal parasites	Opisthokonta	Holozoa	Ichthyosporea
Phagotrophs	Opisthokonta	Nucletmycea	Discicristoidea
Phagotrophs	Sulcozoa	Apusomonadida
Phagotrophs	Sulcozoa	Breviatea
Phagotrophs	Sulcozoa	Rigifilida
