# Supplementary material for: Changes in Trophic Groups of Protists With Conversion of Rainforest Into Rubber and Oil Palm Plantations
Source: Front Microbiol. 2019 Feb 12;10:240. doi: 10.3389/fmicb.2019.00240 (PMC6380168; doi:10.3389/fmicb.2019.00240)
Supplement: Supplementary file 3 [file Table_2.XLSX]

## Sheet: Environmentals
Supplementary Table 2: Means and SD of environmental factors used for db-RDA
data from:	Krashevska et al. 2015 (n=24)																				Drescher et al. 2016 (n=12)										A. Potapov (unpublished, n=24)
land-use system	H2O [%]		Cmic [mg Cmic g−1 dw]		Basal Respiration [μg O2g−1 dw h−1]		pH		C concentration		N concentration		NLFA of arbuscular mycorrhizal fungi (16:1ω5c) [nmol g-1 l dw]		sum of relative PLFAs for gram-positive bacteria (i15:0, a15:0, i16:0, i17:0) [% nmol g-1 l dw]		sum of relative PLFAs of gram-negative bacteria (16:1ω7, cy17:0, cy19:0) [% nmol g-1 l dw]		sum of relative PLFAs of fungi (18:2ω6,9, 18:3ω6, 18:3ω3) [% nmol g-1 l dw]		Air temperatur [°C]		Humidity [%]		Canopy openness [%]		Plant abundance [Individals]		Plant richness [Number of species]		Soil fauna abundance [Individuals]		Soil fauna richness [Number of species]
	mean	SD	mean	SD	mean	SD	mean	SD	mean	SD	mean	SD	mean	SD	mean	SD	mean	SD	mean	SD	mean	SD	mean	SD	mean	SD	mean	SD	mean	SD	mean	SD	mean	SD
F	75.4539	60.2975	476.304	150.165	6.27909	2.25899	3.78208	0.319452	6.04138	4.45253	0.362594	0.154595	8.21438	4.97474	55.1415	9.61609	34.6468	9.15818	25.1261	4.11059	24.7037	0.198427	96.4392	1.3479	2.53875	0.446527	274.5	47.3445	139	27.3222	4462.25	2206.03	24.125	2.42061
J	86.9509	56.6418	558.836	219.122	5.94364	1.94403	4.33667	0.202313	5.70036	2.77386	0.375266	0.13209	12.9981	4.27291	54.6053	8.90534	27.4416	8.15623	28.8802	5.70985	25.16	0.16386	93.1216	1.28276	6.93333	1.83073	161.333	26.7135	77.875	47.0198	2318.88	682.648	22.75	2.98957
O	62.4118	41.6159	442.105	173.206	4.51269	2.22384	4.70125	0.363482	3.41667	1.28707	0.254374	0.0944416	14.2344	9.91648	62.3491	12.433	35.7837	8.73688	26.7354	4.93603	25.5475	0.128817	90.1525	1.5	13.46	3.20748	61.625	15.4105	79.625	44.8969	1858.88	1316.26	18.625	2.4463
R	71.1772	36.5698	420.6	128.885	4.04929	1.13578	4.39479	0.114868	3.50539	2.14494	0.246186	0.0792334	12.4369	5.25494	53.5804	11.2436	26.7605	7.03497	26.3937	4.15931	25.45	0.248847	91.0661	1.06323	15.6425	3.97419	71.125	15.878	138.5	43.5431	1677.25	791.525	20.5	2.91548
